# Supplementary material for: Adaptive Temperature Compensation in Circadian Oscillations
Source: PubMed Central journal article supplement (PMC3395600; doi:10.1371/journal.pcbi.1002585), 2012-07-12

**A**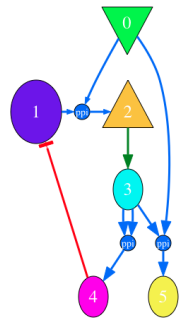**B**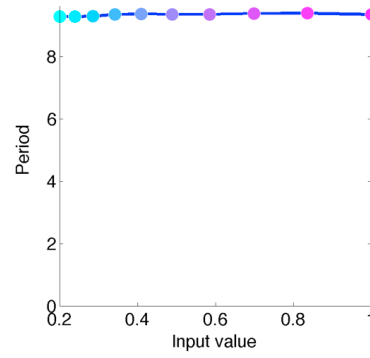**C**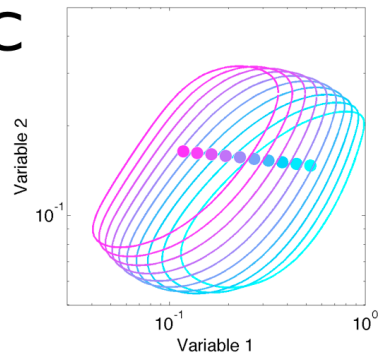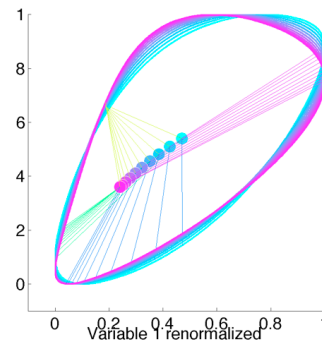**D**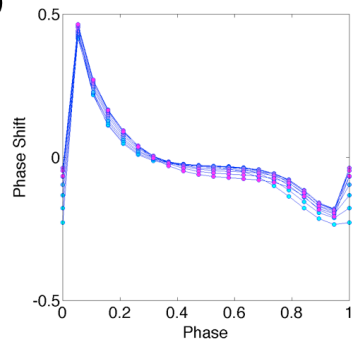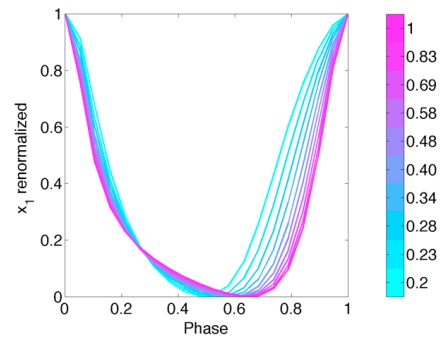

Supplement: pcbi.1002585.s004.pdf [file pcbi.1002585.s004.pdf]
