# Supplementary material for: Adaptive Temperature Compensation in Circadian Oscillations
Source: PubMed Central journal article supplement (PMC3395600; doi:10.1371/journal.pcbi.1002585), 2012-07-12
Supplement: pcbi.1002585.s005.pdf [file pcbi.1002585.s005.pdf]

| Input Value | Min-Max Value for 1 | Relative steady state value for 1 | Relative period |
|-------------|---------------------|-----------------------------------|-----------------|
| 0.4         | 0.58-1.5            | 1.0                               | 1               |
| 0.47        | 0.44- 1.4           | 0.84                              | 1               |
| 0.54        | 0.33-1.2            | 0.71                              | 1               |
| 0.64        | 0.26-1.1            | 0.6                               | 0.99            |
| 0.74        | 0.20-0.98           | 0.51                              | 0.98            |
| 0.86        | 0.16-0.87           | 0.43                              | 0.96            |
| 1.01        | 0.12-0.77           | 0.38                              | 0.94            |
| 1.18        | 0.1-0.67            | 0.31                              | 0.92            |
| 1.37        | 0.08-0.58           | 0.27                              | 0.9             |
| 1.6         | 0.07-0.5            | 0.22                              | 0.86            |
